# Supplementary material
Source: PubMed Central journal article supplement (PMC7814563)
Supplement: 12961_2020_675_MOESM3_ESM.pdf [file 12961_2020_675_MOESM3_ESM.pdf]

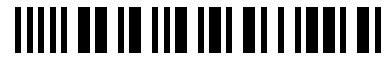

**Thank you for your interest in taking part in this survey. Within the Collaboration for Evidence-based Healthcare and Public Health in Africa (CEBHA+), researchers and stakeholders collaborate on research projects to inform decision-making in healthcare and public health policy-and-practice. The purpose of this survey is to learn more about your experiences as a CEBHA+ partner in order to improve this engagement further - for both the researchers involved and the stakeholders from the policy-and-practice community.**

**This survey consists of 34 questions and statements about your engagement with CEBHA+. For each item, please respond by checking the option that best fits your experience and opinion. Please complete all questions. If a question does not apply, you can indicate this by checking the option "not applicable".**

**A "resume later" option is available if you want to pause the survey and save your answers.**

**We realise that the current situation may have a significant impact on both the content of your daily work, and current ways of working. Therefore, please refer to your experiences before the SARS-CoV-2 pandemic, when answering the questions.**

**If you have any questions, please contact the lead researcher: Kerstin Sell, MD MSc  
Pettenkofer School of Public Health LMU Munich email: [ksell@ibe.med.uni-muenchen.de](mailto:ksell@ibe.med.uni-muenchen.de)**

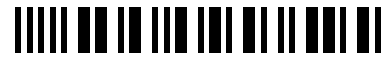

## Section A: Consent

**A1. Your participation in this research is entirely voluntary. We will ask you to create an individual ID code to be used in this survey as well as in a subsequent survey in approximately 2 years. Apart from the individual ID code, your opinion and some demographic information, we will not ask you to provide any personal data such as your name or date of birth. Your information will be collected and analyzed in a pseudonymous form so it will not be possible for anyone to retrace what you have stated. This also applies to any reports or scientific publications resulting from this research. We will securely store collected data on an institutional storage provided by the LMU Munich in compliance with EU data protection regulations. We respect your trust and protect your privacy and will never share data with third parties.**

I have read the above information and I consent voluntarily to be a participant in this survey. I agree with the collection and use of personal data and findings in accordance with the participant information.

I do not want to participate in the study.







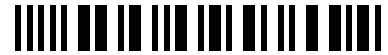

**B4.**

**Instructions:**

Insert two capital letters or two numbers per question, for example:

**Birth month:** if someone was born in March they should write "03".

**First and last letter of one's first name:** someone called Rosemary should write "RY".

**First and last letter of the place of birth:** if someone was born in Cape Town they should write "CN".

Write "DK" if you do not know the answer to the question.

Please answer the following:

Please state the first and last letter of your mother's name

|  |  |  |  |  |  |  |  |  |  |  |  |  |  |  |  |  |  |  |  |
|--|--|--|--|--|--|--|--|--|--|--|--|--|--|--|--|--|--|--|--|
|  |  |  |  |  |  |  |  |  |  |  |  |  |  |  |  |  |  |  |  |
|--|--|--|--|--|--|--|--|--|--|--|--|--|--|--|--|--|--|--|--|

**Section C: Demographic survey**

**C1. Which country do you represent in the CEBHA+ partnership?**

Ethiopia

Uganda

Rwanda

Malawi

South Africa

Other or multiple countries (please specify):

Other or multiple countries (please specify):

|  |
|--|
|  |
|--|

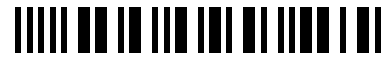

**C2. What is your age?**

- 18 - 24 years
- 25 - 34 years
- 35 - 44 years
- 45 - 54 years
- 55 - 64 years
- 65 years and over

**C3. What is your gender?**

- Female
- Male
- I prefer not to say
- Other gender:

Other gender:

**C4. What is the highest degree or level of schooling you have completed?**

- Some high school, no degree
- High school degree or equivalent
- Some college credit, no degree
- Trade/technical/vocational training
- Associate degree (e.g. AA, AS)
- Bachelor's degree (e.g. BA, BSc, BSN)
- Master's degree (e.g. MA, MSc, MSN)
- Professional degree (e.g. MD, DDS, DVM)
- Doctorate degree (e.g. PhD, EdD)
- Other (please specify)

Other (please specify)

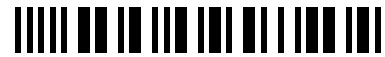

**C5. In which field did you receive this degree? (e.g. medicine, public health, political science, psychology, economics etc.)**

**C6. Which is the main organisation you represent in this partnership?**

- Academic university
- Health service provider at a clinic
- Health service provider at a private practice
- Health service provider in other setting
- Government department, agency or ministry
- Regional or local health authority or equivalent
- Research institute (not within a university)
- Non-governmental organisation
- Other (please specify)

Other (please specify)

**C7. How long have you been employed in the same department within this organisation? (e.g. NCD department)**

- one year or less
- 2 or 3 years
- 4 or 5 years
- 6 - 10 years
- 11 - 15 years
- more than 15 years



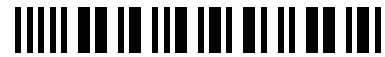

**C8. How many years of professional experience do you have in your current field/discipline?**

5 years or less

6 - 10 years

11 - 15 years

more than 15 years

**C9. How long have you been actively engaged with CEBHA+?**

not yet actively engaged

0 - 6 months

6 - 12 months

13 - 24 months

more than 24 months

**C10. Are you aware of any CEBHA+ research outputs? (for example electronic newsletters, scientific publications, reports, issue briefs, plain-language summaries, conference presentations)**

yes

not yet

I don't know

## Section D: Frequency of Engagement

The following questions cover the area of research you were involved in and the frequency of your engagement with CEBHA+ researchers.

Please refer to your experiences from before the SARS-CoV-2 pandemic, when answering the questions in this survey.

**D1. Within CEBHA+, in which of the following areas of research have you participated?**

*Check all that apply.*

Identifying research topics

Developing the research question

Networking and expanding the research team

Study design

Data collection

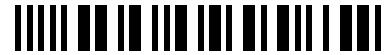

Data analysis

Review or interpretation of results

Dissemination/sharing study findings

Other, please specify

Other, please specify

## D2. Frequency of collaborative engagement

|                                                                                                            | Never                    | 1 or 2 times             | 3 or 4 times             | 5 times or more          | I don't know             |
|------------------------------------------------------------------------------------------------------------|--------------------------|--------------------------|--------------------------|--------------------------|--------------------------|
| How often have you met CEBHA+ researchers in person (e.g. at conferences, workshops, local meetings etc.)? | <input type="checkbox"/> | <input type="checkbox"/> | <input type="checkbox"/> | <input type="checkbox"/> | <input type="checkbox"/> |

## D3. In which of the following ways have you been involved with CEBHA+ researchers and how often were you involved?

**How often have you...**

|                                                                                                       | Never                    | 1 - 5 times              | 6 - 10 times             | more than 10 times       | I don't know             |
|-------------------------------------------------------------------------------------------------------|--------------------------|--------------------------|--------------------------|--------------------------|--------------------------|
| ... communicated with CEBHA+ researchers on the phone? (including skype, zoom calls and GoToMeetings) | <input type="checkbox"/> | <input type="checkbox"/> | <input type="checkbox"/> | <input type="checkbox"/> | <input type="checkbox"/> |
| ... been contacted by CEBHA+ researchers via email to discuss the ongoing research project?           | <input type="checkbox"/> | <input type="checkbox"/> | <input type="checkbox"/> | <input type="checkbox"/> | <input type="checkbox"/> |
| ... reached out to CEBHA+ researchers for some expert advice or referral to other experts?            | <input type="checkbox"/> | <input type="checkbox"/> | <input type="checkbox"/> | <input type="checkbox"/> | <input type="checkbox"/> |
| ... interacted with CEBHA+ researchers on social media (twitter, facebook, instagram etc)?            | <input type="checkbox"/> | <input type="checkbox"/> | <input type="checkbox"/> | <input type="checkbox"/> | <input type="checkbox"/> |
| ... interacted with CEBHA+ researchers using messenger services (whatsapp, threema, signal etc.)?     | <input type="checkbox"/> | <input type="checkbox"/> | <input type="checkbox"/> | <input type="checkbox"/> | <input type="checkbox"/> |
| ... received (electronic) newsletters or other updates (via mail, print material etc.)?               | <input type="checkbox"/> | <input type="checkbox"/> | <input type="checkbox"/> | <input type="checkbox"/> | <input type="checkbox"/> |

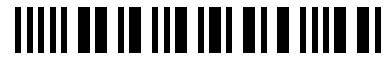

## Section E: Individual characteristics

**E1. This section covers your general perceptions regarding the value of research evidence for policy and practice.**

**Please refer to your experiences from before the SARS-CoV-2 pandemic.**

**Do you agree or disagree with the following statements?**

|                                                                                                              | I agree                  | I disagree               | I don't<br>know/not<br>applicable |
|--------------------------------------------------------------------------------------------------------------|--------------------------|--------------------------|-----------------------------------|
| By the time research findings are published, they are no longer useful to me.                                | <input type="checkbox"/> | <input type="checkbox"/> | <input type="checkbox"/>          |
| There is a disconnect between the research world and the health policy and practice world.                   | <input type="checkbox"/> | <input type="checkbox"/> | <input type="checkbox"/>          |
| Health research is too narrow to be useful to policy-and-practice decision-making.                           | <input type="checkbox"/> | <input type="checkbox"/> | <input type="checkbox"/>          |
| Health research makes recommendations that are too vague for policy-making.                                  | <input type="checkbox"/> | <input type="checkbox"/> | <input type="checkbox"/>          |
| Research addresses questions that help decision-makers make better decisions.                                | <input type="checkbox"/> | <input type="checkbox"/> | <input type="checkbox"/>          |
| Research can address practical problems facing decision-makers from the field of health policy-and-practice. | <input type="checkbox"/> | <input type="checkbox"/> | <input type="checkbox"/>          |
| When confronted with a new problem, it is valuable to speak with health researchers.                         | <input type="checkbox"/> | <input type="checkbox"/> | <input type="checkbox"/>          |
| The claims that research studies make are trustworthy.                                                       | <input type="checkbox"/> | <input type="checkbox"/> | <input type="checkbox"/>          |
| Health research is usually objective.                                                                        | <input type="checkbox"/> | <input type="checkbox"/> | <input type="checkbox"/>          |
| Health researchers are unbiased.                                                                             | <input type="checkbox"/> | <input type="checkbox"/> | <input type="checkbox"/>          |

**E2. The following questions cover your personal views regarding your engagement within the CEBHA+ project.**

**On an individual level, do you agree or disagree with the following statements?**

|                                                                                                     | I agree                  | I disagree               | I don't<br>know/not<br>applicable |
|-----------------------------------------------------------------------------------------------------|--------------------------|--------------------------|-----------------------------------|
| I have enough time to engage in the CEBHA+ research partnership.                                    | <input type="checkbox"/> | <input type="checkbox"/> | <input type="checkbox"/>          |
| Based on my skills and knowledge, I feel confident engaging in research partnerships like CEBHA+.   | <input type="checkbox"/> | <input type="checkbox"/> | <input type="checkbox"/>          |
| I am committed to the collaborative engagement with researchers within CEBHA+.                      | <input type="checkbox"/> | <input type="checkbox"/> | <input type="checkbox"/>          |
| Engaging in mutually beneficial research partnerships to support decision-making makes sense to me. | <input type="checkbox"/> | <input type="checkbox"/> | <input type="checkbox"/>          |
| In research partnerships prior to CEBHA+ I have had predominantly good experiences.                 | <input type="checkbox"/> | <input type="checkbox"/> | <input type="checkbox"/>          |

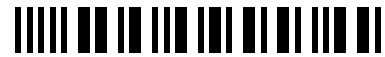

## Section F: Context: barriers & facilitators

In the following section, we would like to hear about potential barriers and facilitators you have faced during your CEBHA+ engagement.

Please refer to your experiences from before the SARS-CoV-2 pandemic.

**F1. Within your organisation, have you encountered any facilitators with respect to your engagement with CEBHA+ researchers (i.e. factors that made it easier to engage with them)?**

**If so, please indicate the three most relevant facilitators.**

*please check the three most relevant factors*

sufficient financial resources

adequate training/education

organisational/administrative or supervisor support

sufficient physical space (e.g. meeting rooms etc)

enough time to engage

incentives for the engagement

a clear vision

motivation for the engagement

continuous staff involvement

other (please specify):

other (please specify):

**F2. Within your organisation, have you encountered any barriers with respect to your engagement with CEBHA+ researchers (i.e. factors that made it more difficult to engage with them)?**

**If so, please indicate the three most relevant barriers.**

*please check the three most relevant factors*

lack of financial resources

lack of training/education

lack of organisational/administrative or supervisor support

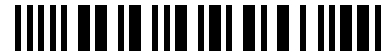

- lack of physical space
- lack of time
- lack of incentives
- lack of a clear vision
- lack of motivation
- lack of staff continuity
- other (please specify):

other (please specify):

**F3. Among the research and practice partners in the CEBHA+ project...**

- |                                                                                             | I agree                  | I disagree               | I don't know/not applicable |
|---------------------------------------------------------------------------------------------|--------------------------|--------------------------|-----------------------------|
| ...roles and responsibilities are communicated explicitly and clearly among partners.       | <input type="checkbox"/> | <input type="checkbox"/> | <input type="checkbox"/>    |
| ... expectations regarding the research partnership are explicit and clear to all partners. | <input type="checkbox"/> | <input type="checkbox"/> | <input type="checkbox"/>    |
| ... project goals and deliverables are explicit and clear to all partners.                  | <input type="checkbox"/> | <input type="checkbox"/> | <input type="checkbox"/>    |

**F4. The research findings from CEBHA+ were presented to me...**

- |                                   | Yes                      | No                       | I don't know/not applicable |
|-----------------------------------|--------------------------|--------------------------|-----------------------------|
| ...in an accessible format.       | <input type="checkbox"/> | <input type="checkbox"/> | <input type="checkbox"/>    |
| ...in an understandable language. | <input type="checkbox"/> | <input type="checkbox"/> | <input type="checkbox"/>    |
| ...in a timely manner.            | <input type="checkbox"/> | <input type="checkbox"/> | <input type="checkbox"/>    |

## Section G: Capacity building

**G1. Please refer to your experiences from before the SARS-CoV-2 pandemic, when answering the questions.**

**Being part of this partnership in CEBHA+, helped me to develop skills to...**

*Please check the answer option that fits your experience and opinion best.*

- |                                       | not at all               | not really               | undecided                | somewhat                 | very much                |
|---------------------------------------|--------------------------|--------------------------|--------------------------|--------------------------|--------------------------|
| ...locate relevant research evidence. | <input type="checkbox"/> | <input type="checkbox"/> | <input type="checkbox"/> | <input type="checkbox"/> | <input type="checkbox"/> |

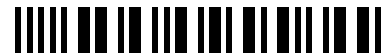

|                                                | not at all               | not really               | undecided                | somewhat                 | very much                |
|------------------------------------------------|--------------------------|--------------------------|--------------------------|--------------------------|--------------------------|
| ...evaluate the quality of research evidence.  | <input type="checkbox"/> | <input type="checkbox"/> | <input type="checkbox"/> | <input type="checkbox"/> | <input type="checkbox"/> |
| ...interpret the results of research.          | <input type="checkbox"/> | <input type="checkbox"/> | <input type="checkbox"/> | <input type="checkbox"/> | <input type="checkbox"/> |
| ...apply research evidence in decision-making. | <input type="checkbox"/> | <input type="checkbox"/> | <input type="checkbox"/> | <input type="checkbox"/> | <input type="checkbox"/> |

**G2. Being part of this research partnership...**

*Please check the answer option that fits your experience and opinion best.*

|                                                                                                                        | not at all               | not really               | undecided                | somewhat                 | very much                |
|------------------------------------------------------------------------------------------------------------------------|--------------------------|--------------------------|--------------------------|--------------------------|--------------------------|
| ...improved my access to relevant research.                                                                            | <input type="checkbox"/> | <input type="checkbox"/> | <input type="checkbox"/> | <input type="checkbox"/> | <input type="checkbox"/> |
| ...improved my access to contacts who I reach out to to obtain information about research that is relevant to my work. | <input type="checkbox"/> | <input type="checkbox"/> | <input type="checkbox"/> | <input type="checkbox"/> | <input type="checkbox"/> |
| ...increased my personal knowledge or understanding about the health issues addressed in CEBHA+.                       | <input type="checkbox"/> | <input type="checkbox"/> | <input type="checkbox"/> | <input type="checkbox"/> | <input type="checkbox"/> |
| ...changed my beliefs/understanding with respect to an intervention, a topic, or a group of people.                    | <input type="checkbox"/> | <input type="checkbox"/> | <input type="checkbox"/> | <input type="checkbox"/> | <input type="checkbox"/> |
| ...confirmed my views about the importance of the health issues addressed.                                             | <input type="checkbox"/> | <input type="checkbox"/> | <input type="checkbox"/> | <input type="checkbox"/> | <input type="checkbox"/> |
| ...increased my confidence in my professional practice or day-to-day activities.                                       | <input type="checkbox"/> | <input type="checkbox"/> | <input type="checkbox"/> | <input type="checkbox"/> | <input type="checkbox"/> |

**G3. As a result of my partnership with CEBHA+, I feel comfortable taking part in similar engagement activities in the future.**

**(e.g. partner with researchers to interpret research findings, engage in new research partnerships)**

I agree

I disagree

I don't know/not applicable

**Section H: Relationship building**

**H1. This section covers the relationship between researchers and their partners from the policy-and-practice community.**

**Please refer to your experiences from before the SARS-CoV-2 pandemic.**

**Within CEBHA+...**

*Please check all that apply*

...a common language is used by all parties (i.e. terminology, common definitions etc).

...partners make their needs and constraints explicit.

...communication is frequent.

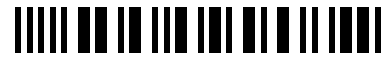

...I am able to express my views freely.

...I feel that my views are heard.

...the respective organisational realities of research partners are being discussed.

...the collaborating partners trust each other.

## Section I: Collaborative research

**I1. The following questions cover the degree of collaboration between researchers and partners from the policy-and-practice community.**

**Please refer to your experiences from before the SARS-CoV-2 pandemic.**

**Within the CEBHA+ research partnership, partners from research and practice in your country jointly...**

*If the research project did not reach the respective stage yet, please check 'not applicable'.*

|                                                                                            | Yes                      | No                       | Not applicable           |
|--------------------------------------------------------------------------------------------|--------------------------|--------------------------|--------------------------|
| ...identified the research questions.                                                      | <input type="checkbox"/> | <input type="checkbox"/> | <input type="checkbox"/> |
| ...designed the research protocols.                                                        | <input type="checkbox"/> | <input type="checkbox"/> | <input type="checkbox"/> |
| ...conducted data collection.                                                              | <input type="checkbox"/> | <input type="checkbox"/> | <input type="checkbox"/> |
| ...analysed data.                                                                          | <input type="checkbox"/> | <input type="checkbox"/> | <input type="checkbox"/> |
| ...evaluated the relevance of research (e.g. of the current project, of new findings etc). | <input type="checkbox"/> | <input type="checkbox"/> | <input type="checkbox"/> |
| ...discussed the findings and implications.                                                | <input type="checkbox"/> | <input type="checkbox"/> | <input type="checkbox"/> |

**I2. Do you agree or disagree with the following statements regarding the CEBHA+ partnership?**

|                                                                                                       | I agree                  | I disagree               | I don't know/not applicable |
|-------------------------------------------------------------------------------------------------------|--------------------------|--------------------------|-----------------------------|
| The individuals involved represent a broad range of perspectives.                                     | <input type="checkbox"/> | <input type="checkbox"/> | <input type="checkbox"/>    |
| CEBHA+ partners value my contributions.                                                               | <input type="checkbox"/> | <input type="checkbox"/> | <input type="checkbox"/>    |
| My contributions are acknowledged in CEBHA+ project documents (e.g. reports, posters, publications).  | <input type="checkbox"/> | <input type="checkbox"/> | <input type="checkbox"/>    |
| The collaboration between stakeholders and researchers in CEBHA+ added value to the ongoing research. | <input type="checkbox"/> | <input type="checkbox"/> | <input type="checkbox"/>    |

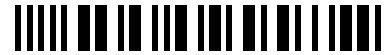

## Section J: Intermediate outcomes

**J1. This section covers outcomes of the CEBHA+ partnership.**

**Please refer to your experiences from before the SARS-CoV-2 pandemic.**

**Do you agree or disagree with the following statements?**

**The research evidence produced in CEBHA+ ...**

|                                                                                              | I agree                  | I disagree               | I don't know/not applicable |
|----------------------------------------------------------------------------------------------|--------------------------|--------------------------|-----------------------------|
| ... is relevant to the health issue addressed by the partnership.                            | <input type="checkbox"/> | <input type="checkbox"/> | <input type="checkbox"/>    |
| ... is directly applicable.                                                                  | <input type="checkbox"/> | <input type="checkbox"/> | <input type="checkbox"/>    |
| ... is trustworthy.                                                                          | <input type="checkbox"/> | <input type="checkbox"/> | <input type="checkbox"/>    |
| I intend to use CEBHA+ research evidence in my work.                                         | <input type="checkbox"/> | <input type="checkbox"/> | <input type="checkbox"/>    |
| Being engaged with CEBHA+ increased my active consideration of research evidence in my work. | <input type="checkbox"/> | <input type="checkbox"/> | <input type="checkbox"/>    |

**J2. The last time I used CEBHA+ research in decision-making, I used it...**

*please check all that apply*

- ...to improve my understanding about the health issue addressed.
- ...to make decisions about program/policy content or directions.
- ...to persuade others (e.g. colleagues, superiors, stakeholders) of a point of view or course of action.
- ...because my organisation required me to use research.
- none of the above



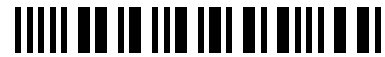

## Section K: Uptake

**K1.** The last question is on the broader impact of your engagement in CEBHA+.

Please refer to your experiences from before the SARS-CoV-2 pandemic.

From my experience, compared to research projects without a policy-and-practice partnership, the research evidence produced in CEBHA+ is...

|                                                                        | I agree                  | I disagree               | I don't know/not applicable |
|------------------------------------------------------------------------|--------------------------|--------------------------|-----------------------------|
| ...more likely to be used in healthcare/public health decision-making. | <input type="checkbox"/> | <input type="checkbox"/> | <input type="checkbox"/>    |
| ...more likely to have a lasting impact on public health.              | <input type="checkbox"/> | <input type="checkbox"/> | <input type="checkbox"/>    |

**K2.** Do you have any other thoughts or comments with respect to your engagement in CEBHA+ that you would like to share? How has your engagement with CEBHA+ researchers changed during the SARS-CoV-2 pandemic? Have you had to pause the engagement or have you been working with CEBHA+ researchers on pandemic-related work?

**Thank you for your participation!**

**If you have any questions, please contact the lead researcher:**

**Kerstin Sell, MD MSc Pettenkofer School of Public Health LMU Munich**

**email: [ksell@ibe.med.uni-muenchen.de](mailto:ksell@ibe.med.uni-muenchen.de)**
